# Supplementary material
Source: PubMed Central journal article supplement (PMC3787253)
Supplement: NIHMS508484-supplement-Supp_Data.pdf [file NIHMS508484-supplement-Supp_Data.pdf]

Supplemental Figure 1:

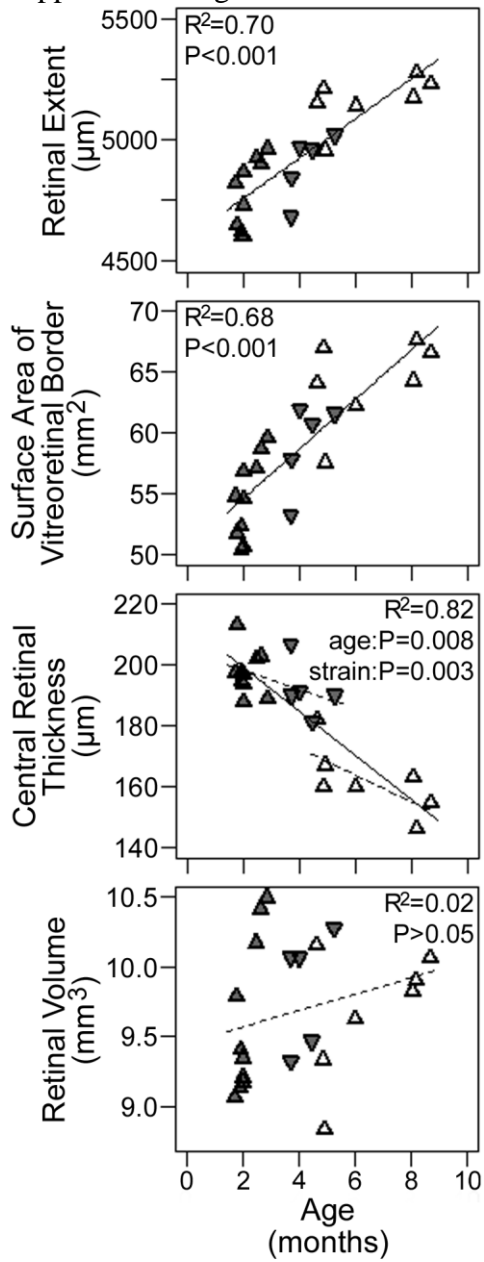

Sprague Dawley (Exp.1( $\Delta$ );N=7)  
Long-Evans (Exp.2( $\blacktriangle$ )&Exp.3( $\blacktriangledown$ );N=15)

Supplemental Figure 2:

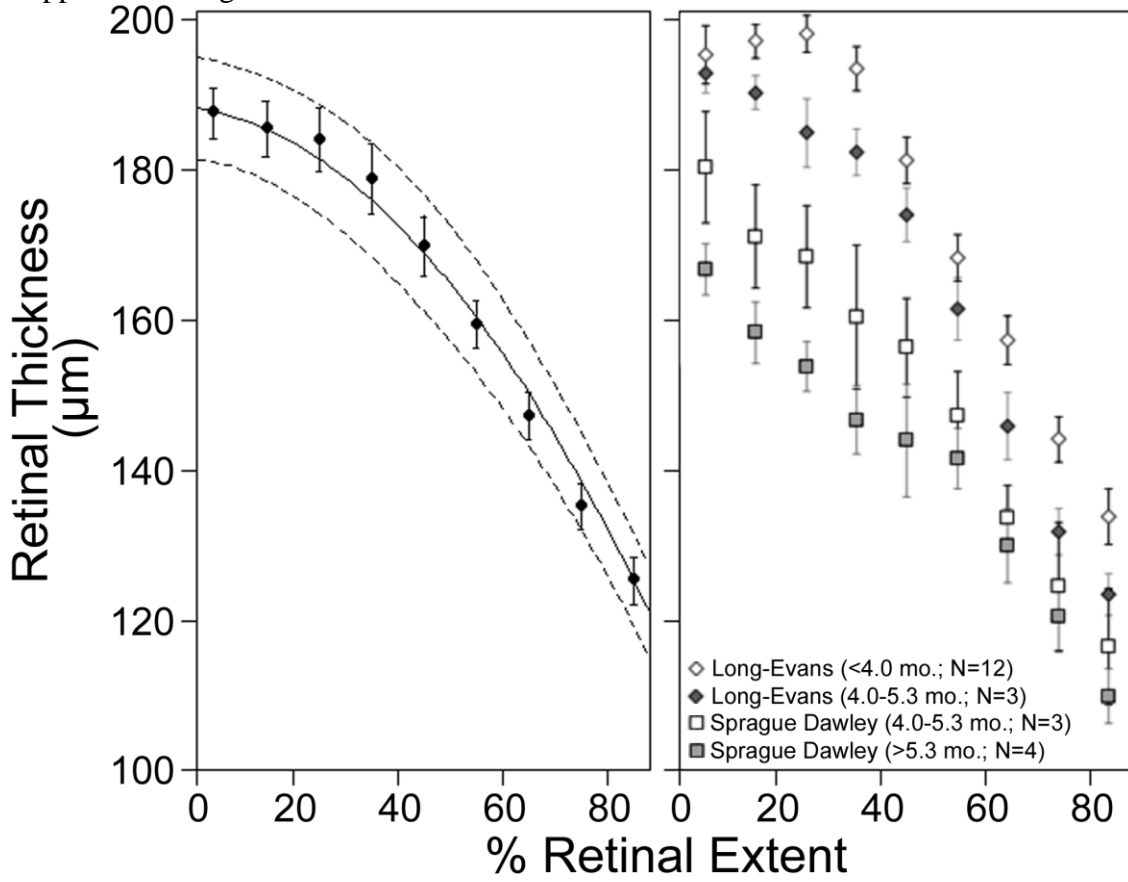

Supplemental Table 1: Internal validation of retinal morphology measurements; correlations between patched and unpatched eyes.

|                                                              | <b>Pearson's<br/>r</b> | <b>p-value</b> |
|--------------------------------------------------------------|------------------------|----------------|
| <b>Retinal Extent</b>                                        | 0.86                   | <0.001         |
| <b>Retinal Thicknesses, by<br/>Eccentricity (% extent)</b>   |                        |                |
| <i>0-10%</i>                                                 | 0.66                   | <0.001         |
| <i>10-20%</i>                                                | 0.75                   | <0.001         |
| <i>20-30%</i>                                                | 0.87                   | <0.001         |
| <i>30-40%</i>                                                | 0.85                   | <0.001         |
| <i>40-50%</i>                                                | 0.71                   | <0.001         |
| <i>50-60%</i>                                                | 0.76                   | <0.001         |
| <i>60-70%</i>                                                | 0.52                   | 0.014          |
| <i>70-80%</i>                                                | 0.41                   | 0.064          |
| <i>80-90%</i>                                                | 0.25                   | 0.261          |
| <b>Surface Area of the Retina<br/>(Vitreoretinal Border)</b> | 0.85                   | <0.001         |
| <b>Volume</b>                                                | 0.45                   | 0.034          |
